# Supplementary material for: Gut dysbiosis associates with cytokine production capacity in viral-suppressed people living with HIV
Source: PubMed Central journal article supplement (PMC10425223; doi:10.3389/fcimb.2023.1202035), 2023-07-31

Supplementary Figures for

**Gut dysbiosis associates with cytokine production capacity in viral-suppressed  
people living with HIV**

Zhang et al.

**Contents of Supplementary Figures**

**Figure S1.** Comparison of the microbial pathway alpha diversity between people living with HIV (PLHIV) and healthy controls (HCs) from DMP cohort.

**Figure S2.** Relative abundance of *Prevotella* species in PLHIV and HCs in DMP cohort.

**Figure S3.** Barplot plot comparing bacterial changes between 96 PLHIV-MSM vs. 53 DMP-MSM and 143 PLHIV vs. 190 DMP-MSW.

**Figure S4.** Barplot plot comparing bacterial changes between 96 PLHIV-MSM vs. 53 DMP-MSM and 143 PLHIV vs. 190 DMP-MSW.

**Figure S5.** Violin plots comparing microbiome indices between the 500FG, DMP and HIV cohorts.

**Figure S6.** Distribution of HIV-related phenotypes in PLHIV.

**Figure S7.** Relationships between HIV-related phenotypes.

**Figure S8.** Heatmap of associations between HIV-associated bacterial signatures (Shannon index, beta diversity, P/B ratio, DI and FI score) and HIV-related phenotypes.

**Figure S9.** Relationship between HIV-related phenotypes and cytokine production capacity.

**Figure S10.** Distribution of *P. copri* strains among people with different sexual orientation in HIV and DMP cohort.

**Figure S11.** Distinct associations of the relative abundances of the control-related strain and HIV-related *Prevotella copri* strain with IL-6 (a, b) and TNF production capacity (c) in HCs from 500FG cohort, established using linear regression.

**Figure S1. Comparison of the microbial pathway alpha diversity between people living with HIV (PLHIV) and healthy controls (HCs) from DMP cohort.** Related to Figure 1. Y-axis is the Shannon index at the bacterial pathway level.

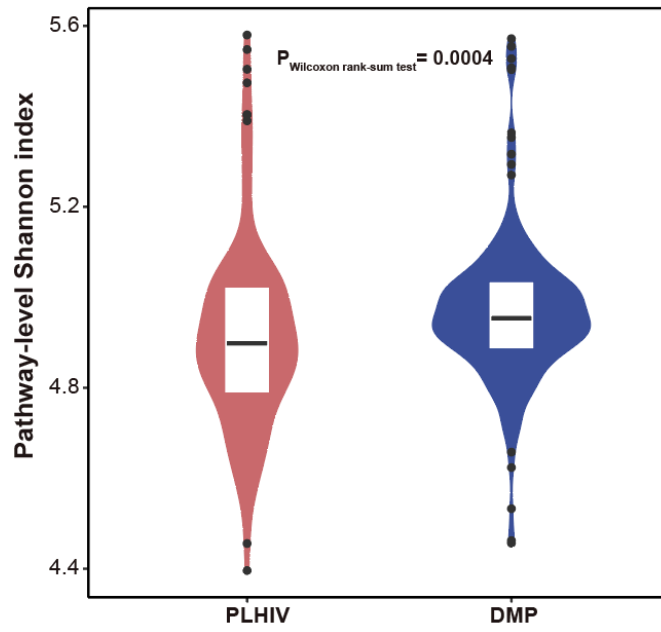

**Figure S2. Relative abundance of *Prevotella* species in PLHIV and HCs in DMP cohort.** Related to Figure 1. **a.** *Prevotella copri*. **b.** *Prevotella* sp 885. **c.** *Prevotella* sp AM42 24. **d.** *Prevotella* sp CAG 1092. **e.** *Prevotella* sp CAG 279. **f.** *Prevotella* sp CAG 520. **g.** *Prevotella* sp CAG 5226. **h.** *Prevotella stercorea*.

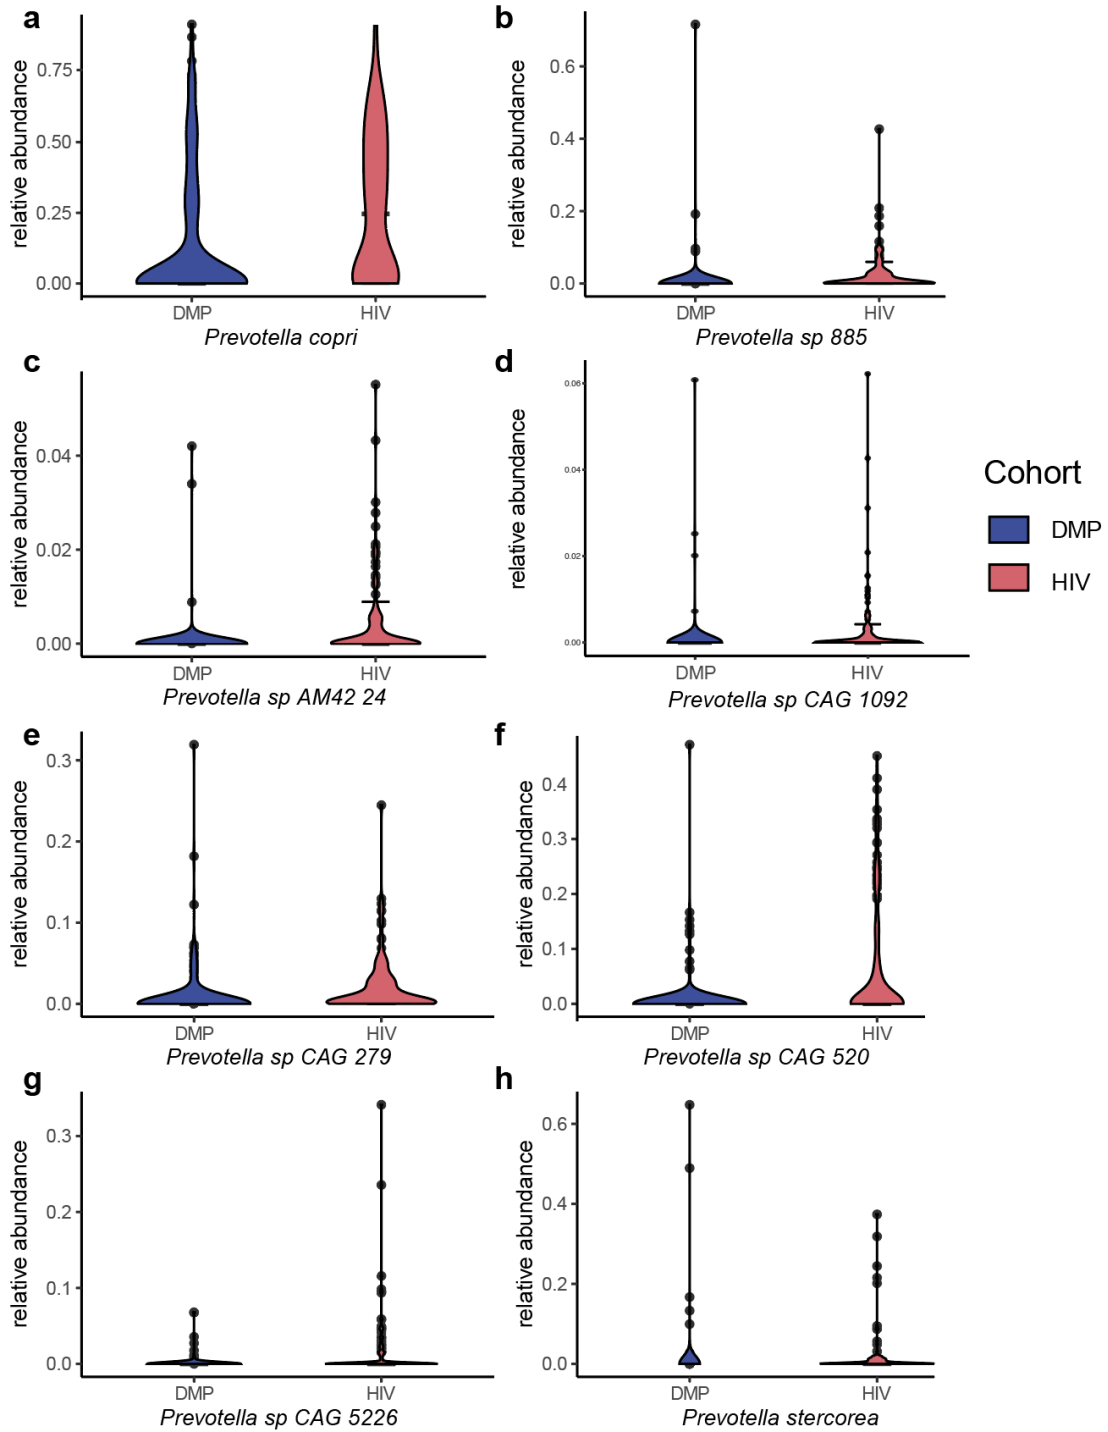

**Figure S3. Barplot plot comparing bacterial changes between 96 PLHIV-MSM vs. 53 DMP-MSM and 143 PLHIV vs. 190 DMP-MSW.** Out of 76 differentially abundant species between 143 PLHIV vs. 190 DMP-MSW, 51 species (89.5%) were replicated at FDR<0.05 level. MSM: men who have sex with men; MSW: men who have sex with women.

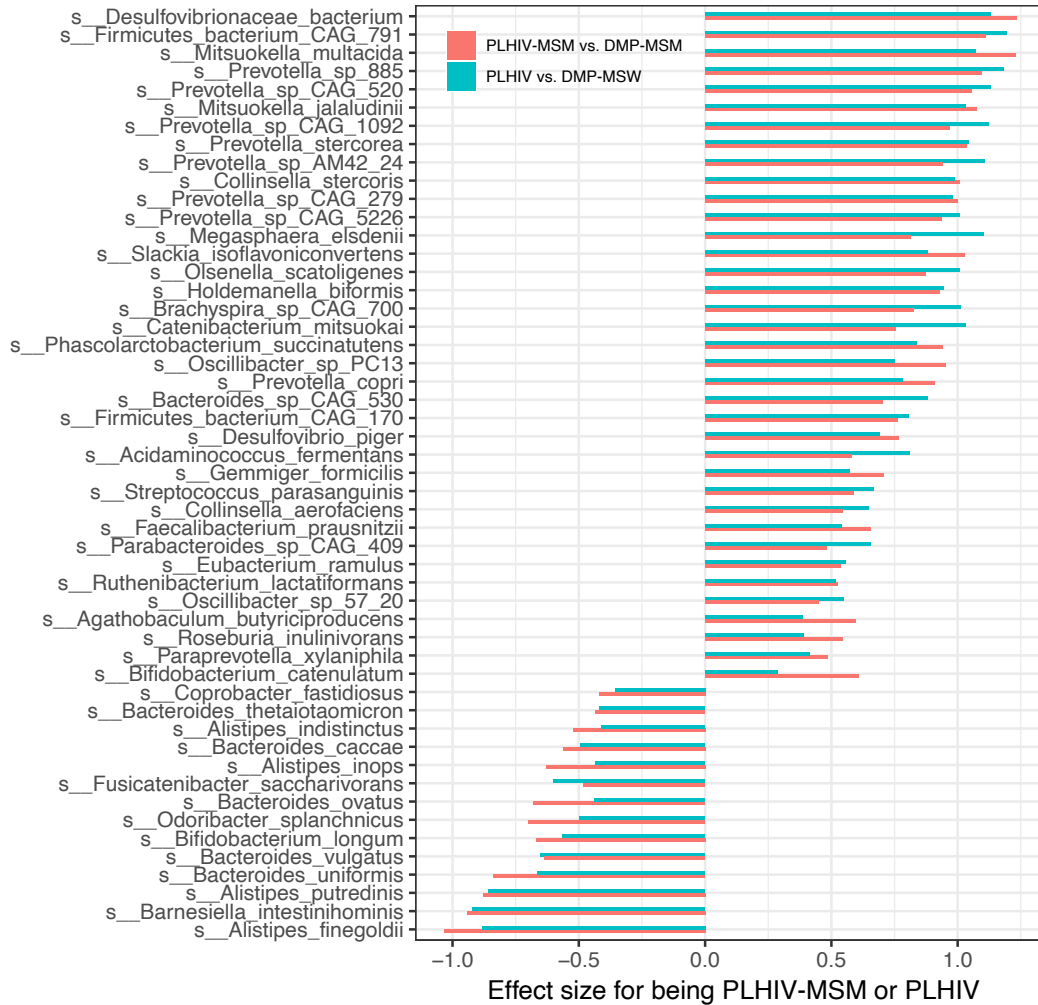

**Figure S4. Barplot plot comparing bacterial changes between 96 PLHIV-MSM vs. 53 DMP-MSM and 143 PLHIV vs. 190 DMP-MSW.** Out of 163 differentially abundant species between 143 PLHIV vs. 190 DMP-MSW, 102 pathways (62.6%) were replicated at FDR<0.05 level. MSM: men who have sex with men; MSW: men who have sex with women.

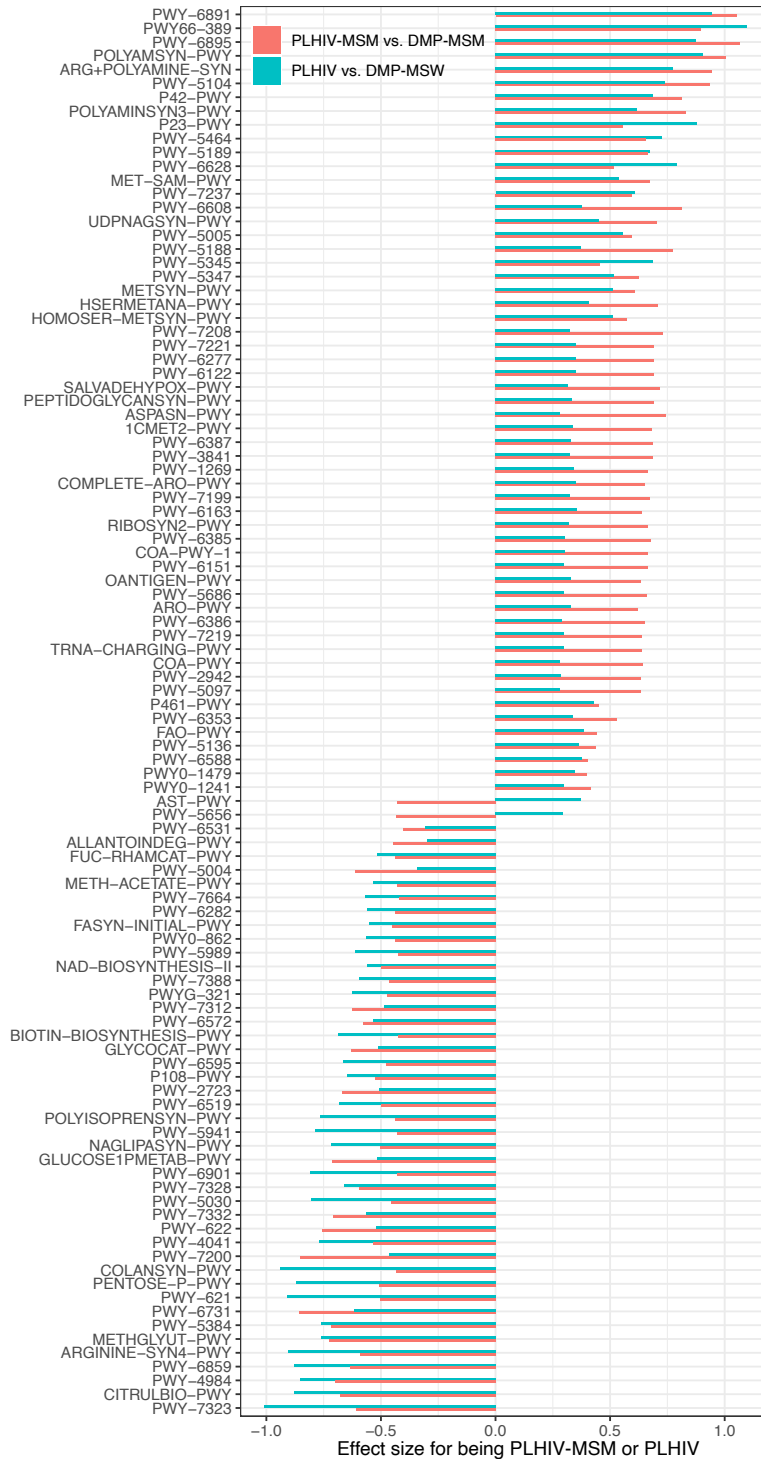

**Figure S5. Violin plots comparing microbiome indices between the 500FG, DMP and HIV cohorts. a. Ratio between *Prevotella* and *Bacteroides* genus (P/B). b. Dysbiosis index (DI) score. c. Functional index (FI) score.**

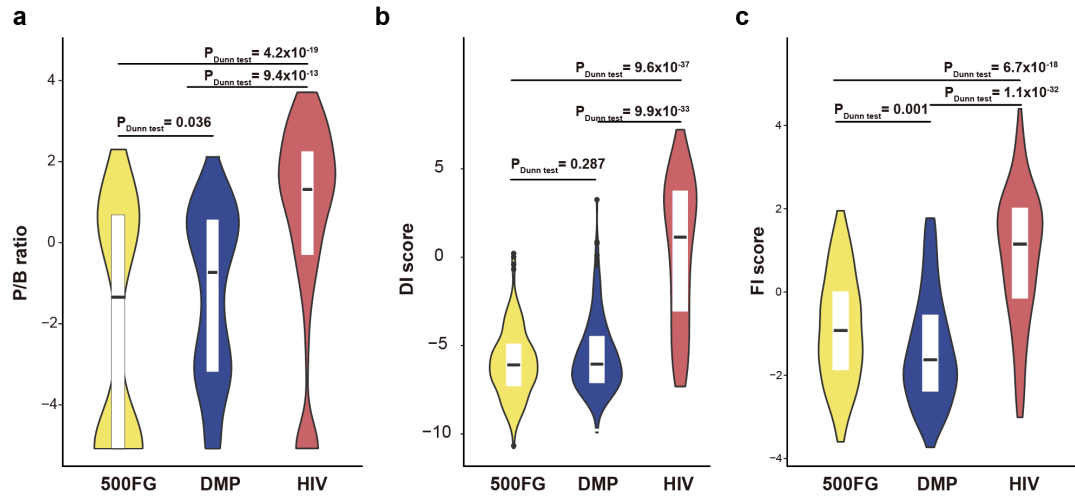

**Figure S6. Distribution of HIV-related phenotypes in PLHIV.**

**a-c.** HIV-1 reservoir measurements in circulating CD4<sup>+</sup> T cells. **(a)** CD4<sup>+</sup> T cell-associated HIV-1 RNA (CA-HIV-RNA), **(b)** CD4<sup>+</sup> T cell-associated HIV-1 DNA (CA-HIV-DNA), **(c)** ratio between CA-RNA and CA-DNA (CA-RNA/CA-DNA). **d-h.** CD4<sup>+</sup> T cell counts. **(d)** CD4<sup>+</sup> T cell counts nadir (CD4 nadir), **(e)** CD4<sup>+</sup> T cell counts latest (CD4 counts), **(f)** ratio between CD4<sup>+</sup> T cell count and CD8<sup>+</sup> T cell counts (CD4/CD8), **(g)** CD4<sup>+</sup> cell recovery absolute value (CD4-recovery-abs), **(h)** CD4<sup>+</sup> cell recovery relative value (CD4-recovery-re). **i.** Sexual orientation data and receptive anal intercourse (RAI) data. **j-k.** Plasma viral load. **(j)** Zenith value of HIV RNA load level in plasma (HIV RNA zenith), **(k)** HIV RNA level in plasma (HIV RNA load). **l-n.** Duration related to infection and treatment. **(l)** Duration of HIV infection (HIV duration), **(m)** Duration of combined antiretroviral therapy (cART duration), **(n)** Duration between diagnosis of HIV and the start of cART (Time diagnosis-cART). Y-axis in A–H and J–N refers to the count of the phenotypes.

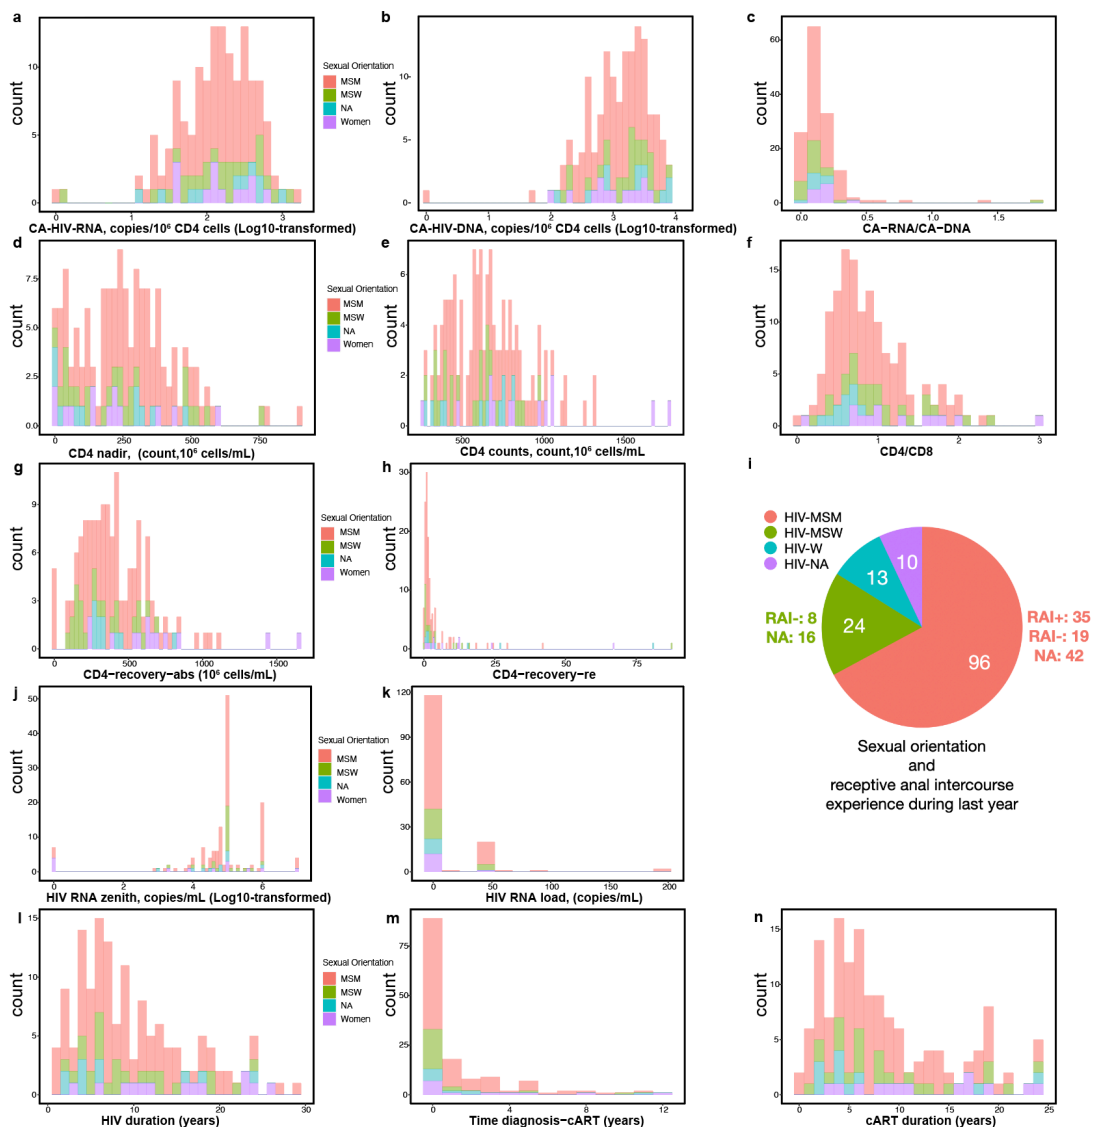

**Figure S7. Relationships between HIV-related phenotypes.** Heatmap shows the Spearman correlation rho between HIV-related phenotypes. Box color indicates the correlation rho. White boxes indicate an FDR value for the correlation  $> 0.1$ .

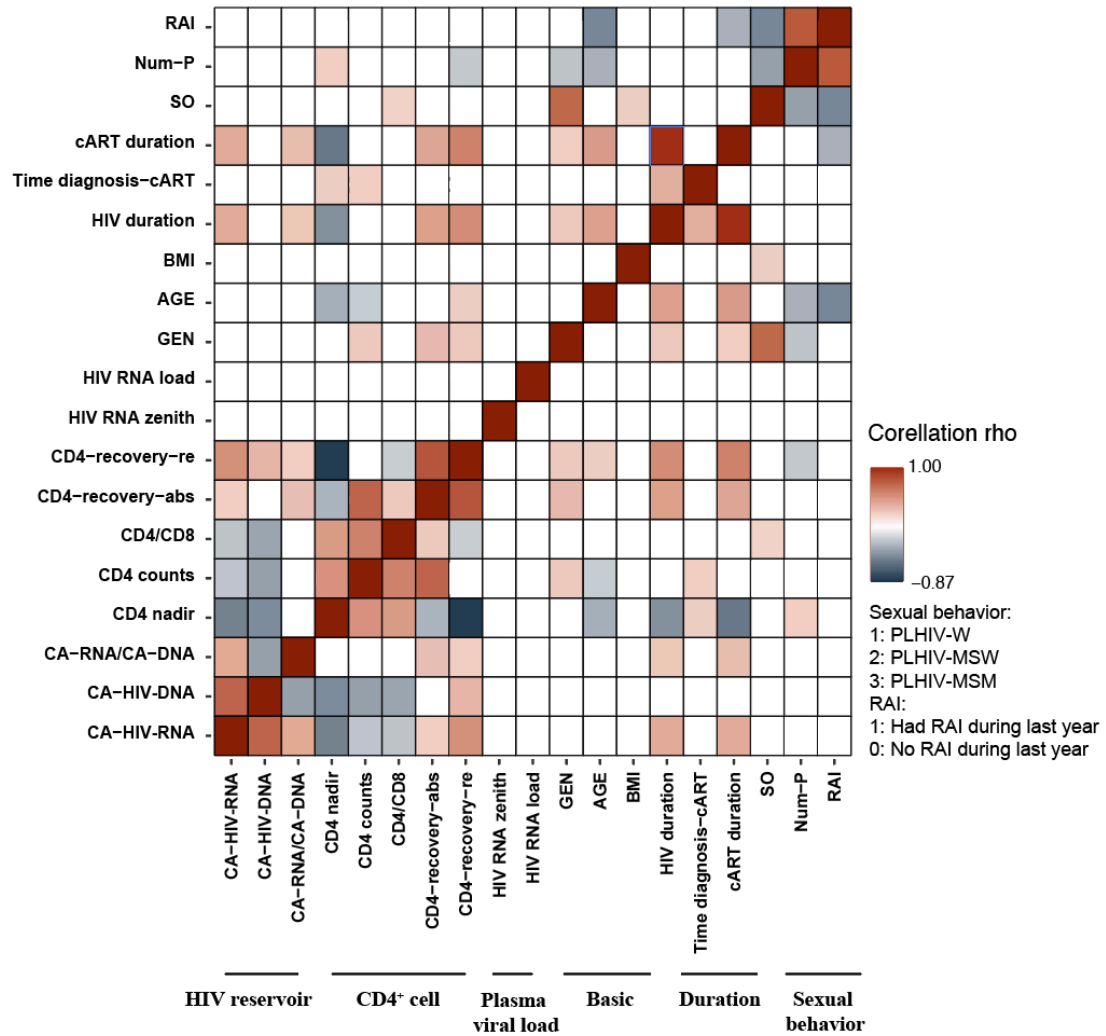



**Figure S8. Heatmap of associations between HIV-associated bacterial signatures (Shannon index, beta diversity, P/B ratio, DI and FI score) and HIV-related phenotypes.** Heatmap shows Spearman correlation rho. HIV-related phenotypes are corrected for age, gender, read count and sexual behavior. Box color indicates the Spearman correlation rho. White box indicates  $P > 0.05$ . Bray-Curtis distance of species and then multiplied by ten to rescale.

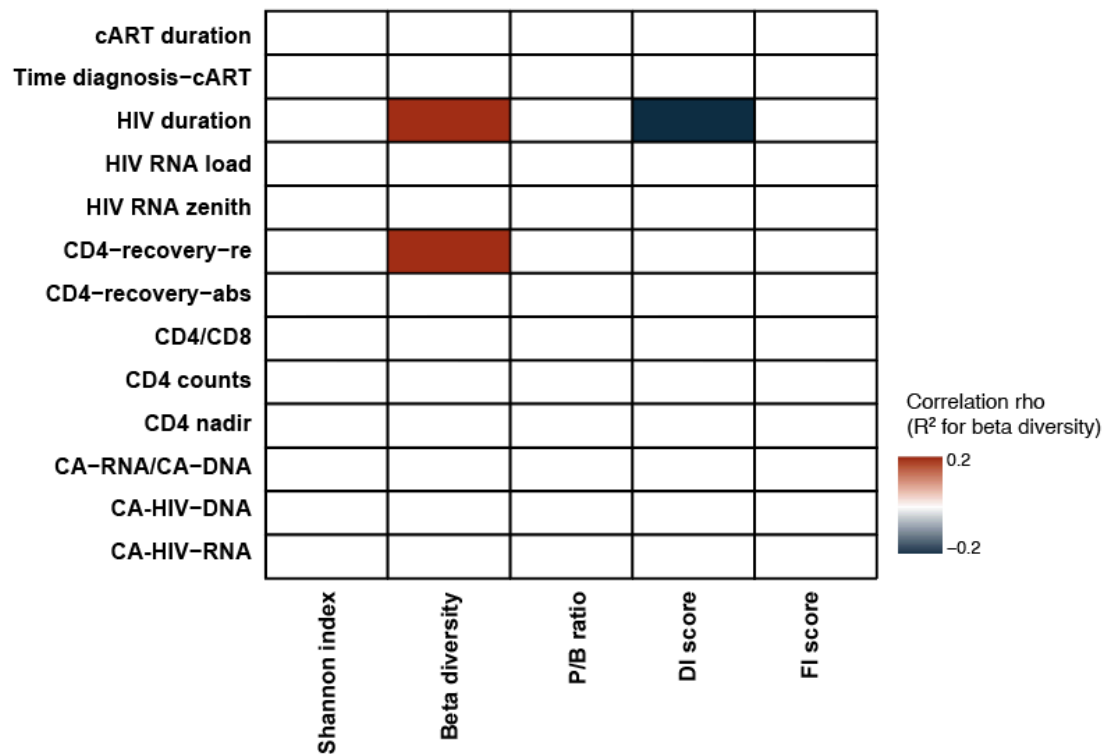

**Figure S9. Relationship between HIV-related phenotypes and cytokine production capacity.** Heatmap shows the Spearman correlation rho between HIV-related phenotypes and cytokine production capacity. Box colors indicate the correlation rho. White indicates an FDR value for the correlation was > 0.1.

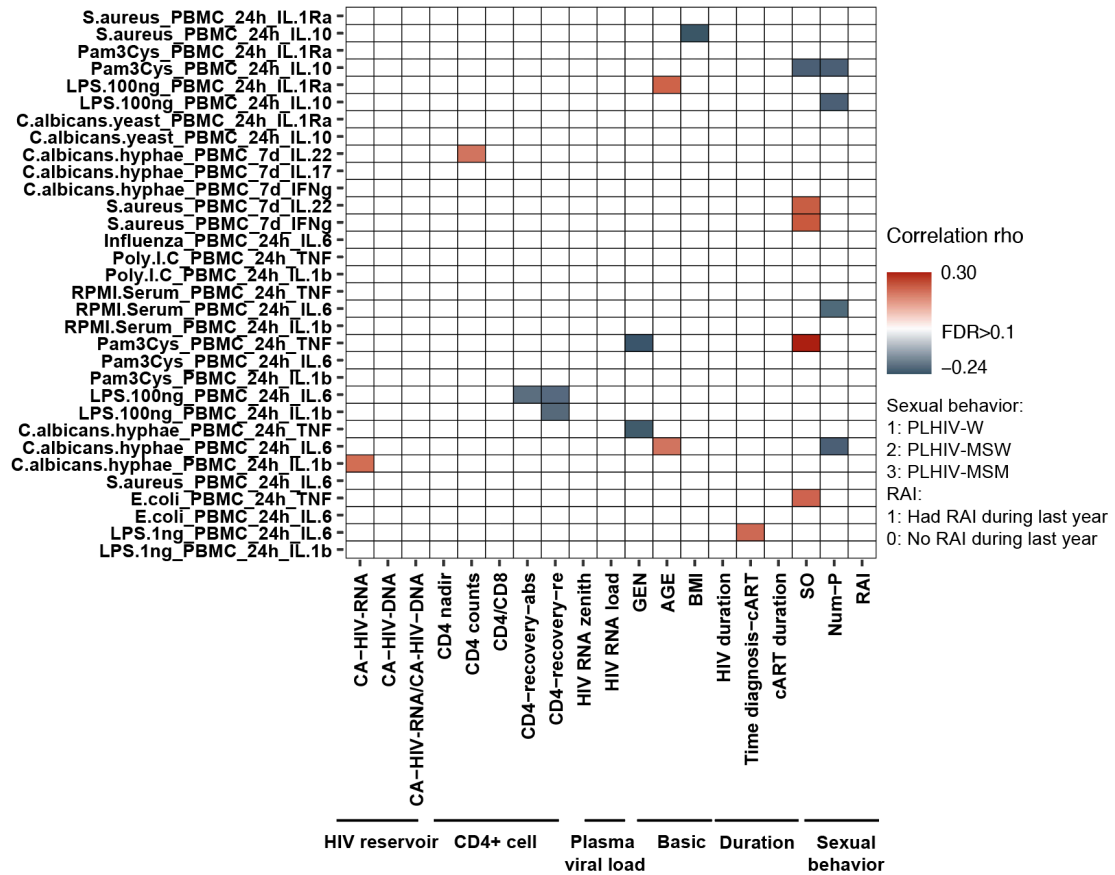

**Figure S10. Distribution of *P. copri* strains among people with different sexual orientation in HIV and DMP cohort.** MSM: men who have sex with men; MSW, men who have sex with women; WSM, women who have sex with men. Compared with DMP-MSM, PLHIV-MSM showed enrichment in PLHIV-related strain (Fisher exact test,  $P = 1.1 \times 10^{-4}$ ). Compared with DMP-MSW, DMP-MSM showed enrichment in PLHIV-related strain (Fisher exact test,  $P = 1.9 \times 10^{-4}$ ). Compared with PLHIV-MSW, PLHIV-MSM also showed enrichment in PLHIV-related strain (Fisher exact test,  $P = 0.01$ ).

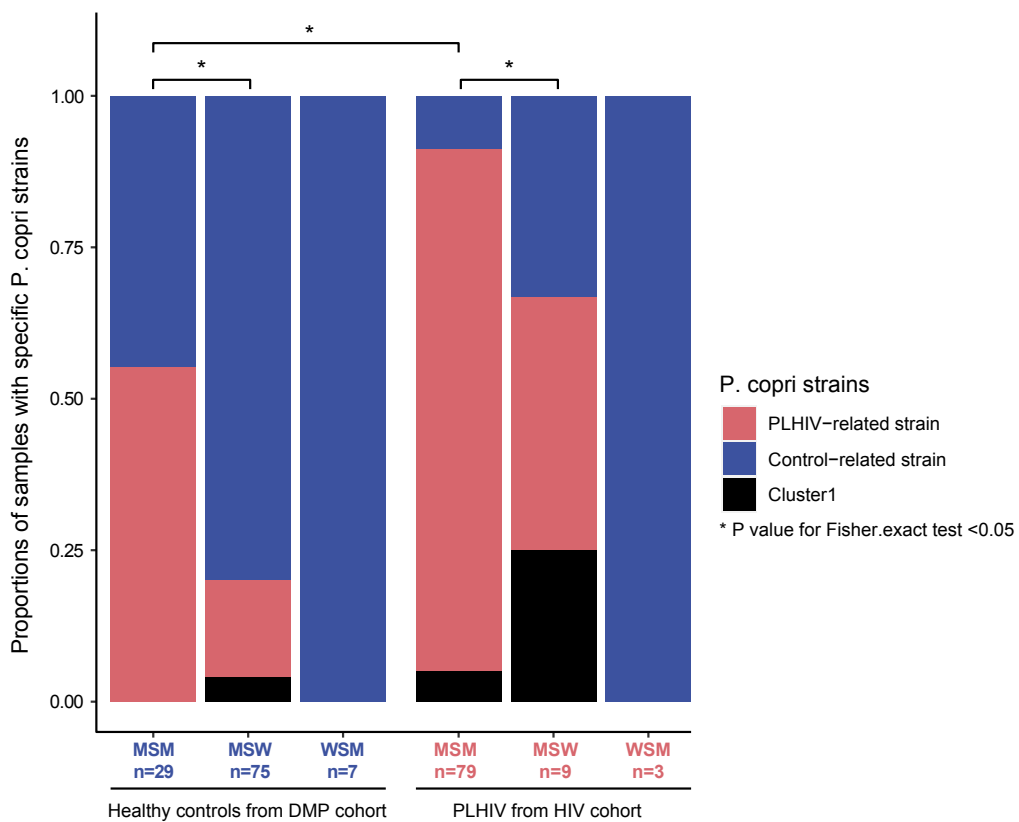

**Figure S11. Associations between *P. copri* strains and cytokine production capacity in HCs and PLHIV, established using linear regression.** Cytokine production was corrected for age, sex, read counts and sexual behavior. (a) The control-related strain showed the opposite associations with Pam3Cys-induced IL-6 production between PLHIV and HCs. (b) The PLHIV-related strain showed a negative association with *Candida albicans*-induced IL-10 production, which didn't show heterogeneity against the control-related strain.

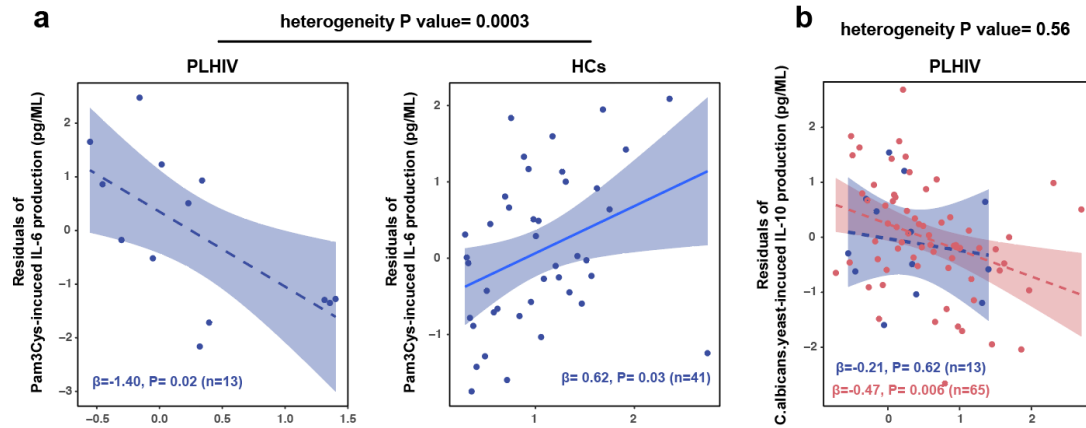

Supplement: DataSheet_1.pdf [file DataSheet_1.pdf]
